# Supplementary material
Source: publisher figshare collection journal article supplement (https://tandf.figshare.com/ndownloader/files/12296456)
Supplement: Supplementary file 1 [file 12296456]

Supplementary Table 1 Triassic igneous rocks in South China

| **No.** | **Provinces** | **Names** | **Rock types** | **Occurrence** | **Ags/ Ma** | **Methods** | **Classification** | **References** |
| --- | --- | --- | --- | --- | --- | --- | --- | --- |
| 1 | Hainan | Qiongzhou | Granite | gneissic | 237±3 | SIMS | I-type | Ge, 2003 |
| 2 | Hainan | Jianfengling | Granite | undeformed | 249±5 | LA | S-type | Xie et al., 2006 |
| 3 | Hainan | Wanning | Gabbro | undeformed | 240±2 | LA |  | Tang et al., 2010 |
| 4 | Hainan | Wanning | Diabase | undeformed | 236±3 | LA |  | Tang et al., 2010 |
| 5 | Hainan | Fengjiezhou | Syenite | undeformed | 231±3 | LA |  | Tang et al., 2010 |
| 6 | Hainan | Yuanshui | Granite | undeformed | 243±4 | SHRIMP | A-type | Zhou et al., 2011 |
| 7 | Hainan | Xinglong | Diabase | undeformed | 238±2 | LA |  | Tang et al., 2013 |
| 8 | Hainan | Xinglong | Granite | undeformed | 234±2 | LA |  | Tang et al., 2013 |
| 9 | Hainan | Shilu | Diorite | undeformed | 248±1 | LA | S-type | Li et al., 2013 |
| 10 | Hainan | Dongfang | Gabbro/diabase | undeformed | 242±3 | LA |  | Chen et al., 2014 |
| 11 | Hainan | Changjiang | Granite | undeformed | 252±3 | LA | I-type | Yan et al., 2017 |
| 12 | Hainan | Wuzhishan | Granite | undeformed | 243±2 | LA | I-type | Yan et al., 2017 |
| 13 | Hainan | Ledong | Granite | undeformed | 242±2 | LA | I-type | Yan et al., 2017 |
| 14 | Hainan | Sanya | Granite | undeformed | 240±2 | LA | I-type | Yan et al., 2017 |
| 15 | Hainan | Lingshui | Granite | undeformed | 228±2 | LA | I-type | Yan et al., 2017 |
| 16 | Guangxi | Miaoershan-Yuechengling | Granite | undeformed | 228±11 | SHRIMP | S-type | Xie et al., 2008 |
| 17 | Guangxi | Miaoershan-Yuechengling | Granite | undeformed | 211±2 | SHRIMP | S-type | Li et al., 2010b |
| 18 | Guangxi | Dasi | Charnockites | gneissic | 244±5 | SHRIMP | S-type | Wang et al., 2013a |
| 19 | Guangxi | Nagui | Charnockites | gneissic | 247±3 | SHRIMP | S-type | Wang et al., 2013a |
| 20 | Guangxi | Nameng | Granite | gneissic | 228±9 | SHRIMP | S-type | Wang et al., 2013a |
| 21 | Guangxi | Daqiling | Granite | undeformed | 225±2 | LA | S-type | Zhang et al., 2014 |
| 22 | Guangxi | Darongshan | Granite | undeformed | 251±2 | SIMS | S-type | Jiao et al., 2015 |
| 23 | Guangxi | Jiuzhou | Granite | undeformed | 250±2 | SIMS | S-type | Jiao et al., 2015 |
| 24 | Guangxi | Taima | Granite | undeformed | 249±2 | SIMS | S-type | Jiao et al., 2015 |
| 25 | Guangxi | Yinnan | Granite | undeformed | 251±3 | LA |  | Chen et al., 2017 |
| 26 | Guangxi | Beiliu | Granite | undeformed | 248±2 | LA |  | Chen et al., 2017 |
| 27 | Guangxi | Langnan | Granite | undeformed | 231±3 | LA | S-type | Song et al., 2017 |
| 28 | Guangdong | Guidong (Maofeng) | Granite | undeformed | 220±1 | SG | S-type | Ling et al., 2005 |
| 29 | Guangdong | Guidong (Luxi) | Granite | undeformed | 238±3 | SHRIMP | S-type | Li and Li, 2007 |
| 30 | Guangdong | Mengdong | Granite | undeformed | 231±3 | SHRIMP |  | Li and Li, 2007 |
| 31 | Guangdong | ZhuGuangshan (Youdong) | Granite | undeformed | 232±4 | SIMS | S-type | Huang et al., 2012 |
| 32 | Guangdong | Guidong (Gaodong) | Granite | undeformed | 233±3 | LA | S-type | Gao et al., 2016 |
| 33 | Guangdong | Zhuguangshan (Baiyun) | Granite | undeformed | 239±4 | SHRIMP | S-type | Deng et al., 2012 |
| 34 | Guangdong | Zhuguangshan (Ledong) | Granite | undeformed | 239±5 | SHRIMP | S-type | Deng et al., 2012 |
| 35 | Guangdong | Zhuguangshan (Jiangnan) | Granite | undeformed | 239±2 | SHRIMP | S-type | Deng et al., 2012 |
| 36 | Guangdong | Zhuguangshan (Longhuashan) | Granite | undeformed | 236±2 | SHRIMP | S-type | Deng et al., 2012 |
| 37 | Guangdong | Zhuguangshan (Zhaidi) | Granite | undeformed | 231±3 | SHRIMP | S-type | Deng et al., 2012 |
| 38 | Guangdong | Zhuguangshan (Dawozi) | Granite | undeformed | 231±2 | SHRIMP | S-type | Deng et al., 2012 |
| 39 | Guangdong | Guidong (Xiazhuang) | Granite | undeformed | 236±8 | LA | S-type | Xu et al., 2003 |
| 40 | Guangdong | Gaozhou | Monzogranite | gneissic | 246±3 | LA | I-type | Qiu et al., 2016 |
| 41 | Guangdong | Napeng | Granite | mylonitic | 205±2 | LA |  | Peng et al., 2006 |
| 42 | Hunan | Xitian | Granite | undeformed | 229±5 | SHRIMP |  | Ma et al., 2005 |
| 43 | Hunan | Xiangzikou | Granite | undeformed | 210±5 | LA |  | Peng et al., 2006 |
| 44 | Hunan | Xiema | Granite | undeformed | 214±6 | LA |  | Peng et al., 2006 |
| 45 | Hunan | Baimashan | Granite | undeformed | 209±4 | LA | S-type | Chen et al., 2007 |
| 46 | Hunan | Baimashan | Granite | undeformed | 205±3 | LA | S-type | Chen et al., 2007 |
| 47 | Hunan | Yangmingshan | Granite | undeformed | 237±5 | SHRIMP | S-type | Wang et al., 2007a |
| 48 | Hunan | Baimashan | Granite | undeformed | 241±3 | SHRIMP |  | Wang et al., 2007a |
| 49 | Hunan | Guandimiao | Granite | undeformed | 239±3 | SHRIMP |  | Wang et al., 2007a |
| 50 | Hunan | Tanshi | Granite | undeformed | 243±4 | SHRIMP |  | Wang et al., 2007a |
| 51 | Hunan | Wawutang | Granite | undeformed | 235±4 | SHRIMP |  | Wang et al., 2007a |
| 52 | Hunan | Wufengxian | Granite | undeformed | 236±6 | SHRIMP |  | Wang et al., 2007a |
| 53 | Hunan | Huangmaoyuan | Granite | undeformed | 222±2 | SHRIMP |  | Li et al., 2008 |
| 54 | Hunan | Gao’aobei | Granite | undeformed | 222±2 | SHRIMP |  | Wang et al., 2010 |
| 55 | Hunan | Taojiang | Granite | undeformed | 217±1 | LA | S-type | Wang et al., 2012 |
| 56 | Hunan | Taojiang | Granite | undeformed | 216±2 | LA | S-type | Wang et al., 2012 |
| 57 | Hunan | Wangxianling | Granite | undeformed | 235±1 | LA |  | Zheng and Guo, 2012 |
| 58 | Hunan | Congyangping | Granite | undeformed | 218±5 | LA |  | Wang et al., 2013a |
| 59 | Hunan | Ziyunshan | Granodiorite | undeformed | 223±1 | LA |  | Liu et al., 2014 |
| 60 | Hunan | Ziyunshan | Granite | undeformed | 222±2 | LA | S-type | Liu et al., 2014 |
| 61 | Hunan | Yangmingshan | Granite | undeformed | 229±2 | LA | S-type | Liu et al., 2014 |
| 62 | Hunan | Yangmingshan | Granite | undeformed | 218±2 | LA | S-type | Liu et al., 2014 |
| 63 | Hunan | Baimashan | Granite | undeformed | 216±2 | SHRIMP |  | Li et al., 2014 |
| 64 | Hunan | Baimashan | Granite | undeformed | 212±2 | SHRIMP |  | Li et al., 2014 |
| 65 | Hunan | Dashenshan | Granite | undeformed | 211±3 | SHRIMP | I-type | Xu et al., 2014b |
| 66 | Hunan | Dengfuxian | Granite | undeformed | 226±2 | LA | A-type | Cai et al., 2015 |
| 67 | Hunan | Weishan | Granite | undeformed | 216±2 | LA |  | Ding et al., 2015 |
| 68 | Hunan | Weishan | Granite | undeformed | 211±2 | LA |  | Ding et al., 2015 |
| 69 | Hunan | Taojiang | Granite | mylonitic | 217±2 | LA |  | Shu et al., 2015 |
| 70 | Hunan | Yangmingshan | Monzogranite | mylonitic | 227±4 | LA |  | Shu et al., 2015 |
| 71 | Hunan | Jiangjunmiao | Monzonite | undeformed | 218±2 | LA |  | Song et al., 2017 |
| 72 | Hunan | Tashan | Monzonite | undeformed | 222±4 | LA |  | Song et al., 2017 |
| 73 | Hunan | Tashan | Monzonite | mylonitic | 225±3 | LA |  | Song et al., 2017 |
| 74 | Hunan | Tashan | Granite | undeformed | 227±3 | LA |  | Song et al., 2017 |
| 75 | Hunan | Wangxianling | Granite | mylonitic | 221±2 | LA |  | Song et al., 2017 |
| 76 | Hunan | Wangxianling | Monzonite | mylonitic | 224±3 | LA |  | Song et al., 2017 |
| 77 | Hunan | Guangdimiao (Shizuqiao) | Granite | undeformed | 226±2 | LA | A-type | Zhao et al., 2017 |
| 78 | Hunan | Guangdimiao (Jingtou) | Monzonite | undeformed | 223±3 | LA | A-type | Zhao et al., 2017 |
| 79 | Jiangxi | Wuliting | Granite | undeformed | 238±1 | SG |  | Zhang et al., 2004 |
| 80 | Jiangxi | Zhuguangshan (Longyuanba) | Granite | undeformed | 211±4 | LA | S-type | Zhang et al., 2006 |
| 81 | Jiangxi | Zhuguangshan (Longyuanba) | Granite | undeformed | 241±1 | LA | S-type | Zhang et al., 2006 |
| 82 | Jiangxi | Fucheng | Granite | undeformed | 231±16 | LA | A-type | Yu et al., 2007 |
| 83 | Jiangxi | Fucheng | Granite | undeformed | 239±17 | LA | A-type | Yu et al., 2007 |
| 84 | Jiangxi | Hongshan | Granite | undeformed | 229±7 | LA | A-type | Yu et al., 2007 |
| 85 | Jiangxi | Baimianshi | Granite | undeformed | 241±7 | LA | S-type | Dong et al., 2010 |
| 86 | Jiangxi | Guikeng | Granite | undeformed | 234±3 | SHRIMP | S-type | Mao et al., 2011 |
| 87 | Jiangxi | Guikeng | Granite | undeformed | 220±3 | SHRIMP | S-type | Mao et al., 2011 |
| 88 | Jiangxi | Mengshan | Granite | undeformed | 236±3 | LA |  | Zhong et al., 2011 |
| 89 | Jiangxi | Mengshan | Granite | undeformed | 220±3 | LA |  | Zhong et al., 2011 |
| 90 | Jiangxi | Mengshan | Granite | undeformed | 217±1 | LA |  | Zhong et al., 2011 |
| 91 | Jiangxi | Baohuashan | Monzongranite | undeformed | 228±2 | LA |  | Liu, 2013 |
| 92 | Jiangxi | Jintan | Granite | undeformed | 239±1 | LA | S-type | Zhao et al., 2013 |
| 93 | Jiangxi | Jintan | Granite | undeformed | 226±2 | LA | S-type | Zhao et al., 2013 |
| 94 | Jiangxi | Baohuashan (Caijiang) | Granite | undeformed | 228±2 | LA | A-type | Zhao et al., 2013 |
| 95 | Jiangxi |  | Granite | undeformed | 214±2 | LA |  | Shu et al., 2015 |
| 96 | Jiangxi | Zhuguangshan (Miantuwo) | Granite | undeformed | 233±2 | LA | A-type | Sun et al., 2017 |
| 97 | Jiangxi | Pingtan | Granite | undeformed | 233±2 | LA | A-type | Sun et al., 2017 |
| 98 | Fujian | Yangfang | Syenite | undeformed | 242±4 | SHRIMP |  | Wang et al., 2005a |
| 99 | Fujian | Xiaotao | Granite | undeformed | 222±3 | LA | S-type | Wang et al., 2007b |
| 100 | Fujian | Wuping | Granite | undeformed | 230±2 | LA |  | Xu et al., 2011 |
| 101 | Fujian | Qinxi | Granite | undeformed | 224±2 | LA | I-type | Li et al., 2012c |
| 102 | Fujian | Boheng | Granite | undeformed | 236±2 | LA |  | Liu, 2013 |
| 103 | Fujian | Pinghu | Syenite | undeformed | 235±1 | LA |  | Liu, 2013 |
| 104 | Fujian | Pinghu | Syenogranite | undeformed | 235±1 | LA |  | Liu, 2013 |
| 105 | Fujian | Julin | Syenogranite | undeformed | 225±2 | LA |  | Liu, 2013 |
| 106 | Fujian | Dayinchang | Granite | undeformed | 237±2 | LA | A-type | Wang et al., 2013b |
| 107 | Fujian | Dayinchang | Granite | undeformed | 228±2 | LA | A-type | Wang et al., 2013b |
| 108 | Fujian | Xiamao | Diabase | undeformed | 224±1 | LA |  | Wang et al., 2013b |
| 109 | Fujian | Luoguyan | Granite | undeformed | 234±2 | LA | I-type | Xiang et al., 2013 |
| 110 | Fujian | Luoguyan | Granite | undeformed | 227±3 | LA | I-type | Xiang et al., 2013 |
| 111 | Fujian | Gaoxi | Granite | undeformed | 232±2 | LA | A-type | Zhao et al., 2013 |
| 112 | Fujian | Gaoxi | Granite | undeformed | 229±2 | LA | A-type | Zhao et al., 2013 |
| 113 | Fujian | Jinlongyan | Granite | undeformed | 224±3 | LA | A-type | Cai et al., 2017 |
| 114 | Fujian | Guiyantou | Granite | undeformed | 232±4 | LA | A-type | Gao et al., 2018 |
| 115 | Fujian | Guiyantou | Granite | undeformed | 231±7 | LA | A-type | Gao et al., 2018 |
| 116 | Zhejiang | Wengshan | Granite | undeformed | 224±3 | LA | A-type | Sun et al., 2011 |
| 117 | Zhejiang | Wengshan | Granite | undeformed | 225±1 | SIMS | A-type | Sun et al., 2011 |
| 118 | Zhejiang | Dashuang | Quartz Monzonite | undeformed | 236±3 | LA | A-type | Liu, 2013 |
| 119 | Zhejiang | Dashuang | Syenite | undeformed | 240±3 | LA |  | Liu, 2013 |
| 120 | Zhejiang | Meitian | Quartz Monzonite | undeformed | 240±3 | LA |  | Liu, 2013 |
| 121 | Zhejiang | Meitian | Granite | undeformed | 236±2 | LA |  | Liu, 2013 |
| 122 | Zhejiang | Shiban | Syenite | undeformed | 238±2 | LA |  | Liu, 2013 |
| 123 | Zhejiang | Zhouzhuang | Quartz Monzonite | undeformed | 237±2 | LA |  | Liu, 2013 |
| 124 | Zhejiang | Dashuang | Monzonite | undeformed | 232±1 | LA | A-type | Mao et al., 2013 |
| 125 | Zhejiang | Dashuang | Syenite | undeformed | 232±1 | LA |  | Mao et al., 2013 |
| 126 | Zhejiang | Dashuang | Monzonite | undeformed | 227±2 | LA | A-type | Xu et al., 2013a |
| 127 | Zhejiang | Dashuang | Monzonite | undeformed | 227±2 | LA | A-type | Zhu et al., 2013 |
| 128 | Zhejiang | Dashuang | Syenite | undeformed | 224±3 | LA |  | Zhu et al., 2013 |
| 129 | Zhejiang | Dashuang | Quartz Monzonite | undeformed | 246±3 | LA | A-type | Gao et al.,, 2014a |
| 130 | Zhejiang | Dashuang | Monzogranite | undeformed | 241±3 | LA | A-type | Gao et al.,, 2014a |
| 131 | Zhejiang | Jingju | Monzogranite | undeformed | 234±3 | LA | A-type | Gao et al.,, 2014a |
| 132 | Zhejiang | Jingju | Granite | undeformed | 231±3 | LA | A-type | Gao et al.,, 2014a |
| 133 | Zhejiang | Sheyang | Granite | undeformed | 225±1 | LA | A-type | Zhu et al.,, 2014 |
| 134 | Zhejiang | Qiuwang | Granite | undeformed | 226±1 | LA | A-type | Zhu et al.,, 2016 |
| 135 | Zhejiang | Dashuang | Syenite | undeformed | 235±4 | LA |  | This study |
| 136 | Zhejiang | Dashuang | Quartz Monzonite | undeformed | 232±3 | LA | A-type | This study |
| 137 | Zhejiang | Dashuang | Granite | undeformed | 230±1 | LA |  | This study |

Supplementary Table 2 La-ICP-MS zircon U-Pb isotope analytical results of the Dashuang complex and Chencai Group

| Sample | Th | U | Th/U | 207Pb/235U | 207Pb/235U | 206Pb/238U | 206Pb/238U | 207Pb/235U | 207Pb/235U | 206Pb/238U | 206Pb/238U |
| --- | --- | --- | --- | --- | --- | --- | --- | --- | --- | --- | --- |
| ppm | ppm | Ratio | Ratio | 1sigma | Ratio | 1sigma | Age (Ma) | 1sigma | Age (Ma) | 1sigma |
| Sample 16JN-57-5, syenite in the northwestern part of the Dashuang complex | | | | | | | | | | | |
| 16JN-57-5-1 | 155 | 114 | 1.36 | 0.261332 | 0.107329 | 0.037286 | 0.001838 | 236 | 86 | 236 | 11 |
| 16JN-57-5-2 | 379 | 293 | 1.29 | 0.268274 | 0.053671 | 0.037958 | 0.001255 | 241 | 43 | 240 | 8 |
| 16JN-57-5-3 | 122 | 93 | 1.31 | 0.265326 | 0.158404 | 0.036966 | 0.002170 | 239 | 127 | 234 | 13 |
| 16JN-57-5-4 | 350 | 399 | 0.88 | 0.260142 | 0.048395 | 0.036977 | 0.001081 | 235 | 39 | 234 | 7 |
| 16JN-57-5-5 | 471 | 415 | 1.14 | 0.259703 | 0.043216 | 0.037068 | 0.001083 | 234 | 35 | 235 | 7 |
| 16JN-57-5-6 | 229 | 308 | 0.74 | 0.262646 | 0.071181 | 0.037747 | 0.001358 | 237 | 57 | 239 | 8 |
| 16JN-57-5-7 | 272 | 172 | 1.59 | 0.291210 | 0.086231 | 0.040267 | 0.001582 | 260 | 68 | 254 | 10 |
| 16JN-57-5-8 | 199 | 171 | 1.16 | 0.302509 | 0.112170 | 0.042019 | 0.002098 | 268 | 87 | 265 | 13 |
| 16JN-57-5-9 | 932 | 827 | 1.13 | 0.245150 | 0.029664 | 0.035675 | 0.001054 | 223 | 24 | 226 | 7 |
| 16JN-57-5-10 | 866 | 316 | 2.74 | 0.258064 | 0.036269 | 0.037358 | 0.001289 | 233 | 29 | 236 | 8 |
| 16JN-57-5-11 | 482 | 374 | 1.29 | 0.256164 | 0.032656 | 0.037398 | 0.001252 | 232 | 26 | 237 | 8 |
| 16JN-57-5-12 | 316 | 210 | 1.50 | 0.258660 | 0.044717 | 0.037274 | 0.001386 | 234 | 36 | 236 | 9 |
| 16JN-57-5-13 | 180 | 227 | 0.79 | 0.257601 | 0.039768 | 0.037389 | 0.001268 | 233 | 32 | 237 | 8 |
| 16JN-57-5-14 | 405 | 353 | 1.15 | 0.258146 | 0.036290 | 0.037070 | 0.001066 | 233 | 29 | 235 | 7 |
| 16JN-57-5-15 | 111 | 129 | 0.86 | 0.254469 | 0.078697 | 0.036696 | 0.001819 | 230 | 64 | 232 | 11 |
| 16JN-57-5-16 | 244 | 152 | 1.60 | 0.263788 | 0.047036 | 0.037241 | 0.001458 | 238 | 38 | 236 | 9 |
| 16JN-57-5-17 | 296 | 172 | 1.73 | 0.262078 | 0.049101 | 0.037073 | 0.001464 | 236 | 40 | 235 | 9 |
| 16JN-57-5-18 | 253 | 186 | 1.36 | 0.261586 | 0.050015 | 0.037451 | 0.001397 | 236 | 40 | 237 | 9 |
| 16JN-57-5-19 | 202 | 195 | 1.04 | 0.249697 | 0.057160 | 0.036691 | 0.001322 | 226 | 46 | 232 | 8 |
| 16JN-57-5-20 | 109 | 110 | 0.98 | 0.267241 | 0.077416 | 0.037310 | 0.001751 | 240 | 62 | 236 | 11 |
| Sample 16JN-58-5, quartz monzonite in the southeastern part of the Dashuang complex | | | | | | | | | | | |
| 16JN-58-5-1 | 343 | 355 | 0.97 | 0.269078 | 0.035538 | 0.037116 | 0.001055 | 242 | 28 | 235 | 7 |
| 16JN-58-5-2 | 347 | 382 | 0.91 | 0.264641 | 0.031257 | 0.036940 | 0.001078 | 238 | 25 | 234 | 7 |
| 16JN-58-5-3 | 437 | 464 | 0.94 | 0.243878 | 0.032081 | 0.034912 | 0.000953 | 222 | 26 | 221 | 6 |
| 16JN-58-5-4 | 336 | 354 | 0.95 | 0.265311 | 0.040878 | 0.037047 | 0.001155 | 239 | 33 | 235 | 7 |
| 16JN-58-5-5 | 264 | 265 | 1.00 | 0.256579 | 0.046132 | 0.036651 | 0.001221 | 232 | 37 | 232 | 8 |
| 16JN-58-5-6 | 210 | 262 | 0.80 | 0.259805 | 0.197899 | 0.036257 | 0.001287 | 235 | 160 | 230 | 8 |
| 16JN-58-5-7 | 296 | 348 | 0.85 | 0.254065 | 0.052114 | 0.036882 | 0.001137 | 230 | 42 | 233 | 7 |
| 16JN-58-5-8 | 285 | 356 | 0.80 | 0.266504 | 0.057904 | 0.037166 | 0.001169 | 240 | 46 | 235 | 7 |
| 16JN-58-5-9 | 344 | 334 | 1.03 | 0.263576 | 0.065501 | 0.036791 | 0.001325 | 238 | 53 | 233 | 8 |
| 16JN-58-5-10 | 304 | 291 | 1.04 | 0.259697 | 0.070625 | 0.036565 | 0.001288 | 234 | 57 | 232 | 8 |
| 16JN-58-5-11 | 329 | 373 | 0.88 | 0.256526 | 0.059796 | 0.037063 | 0.001179 | 232 | 48 | 235 | 7 |
| 16JN-58-5-12 | 254 | 181 | 1.40 | 0.262323 | 0.075629 | 0.036602 | 0.001729 | 237 | 61 | 232 | 11 |
| 16JN-58-5-13 | 376 | 353 | 1.07 | 0.262973 | 0.052179 | 0.036735 | 0.001165 | 237 | 42 | 233 | 7 |
| 16JN-58-5-14 | 977 | 554 | 1.76 | 0.254341 | 0.044772 | 0.036659 | 0.000948 | 230 | 36 | 232 | 6 |
| 16JN-58-5-15 | 231 | 287 | 0.80 | 0.253946 | 0.047846 | 0.037118 | 0.001186 | 230 | 39 | 235 | 7 |
| 16JN-58-5-16 | 435 | 448 | 0.97 | 0.254215 | 0.037693 | 0.036787 | 0.001135 | 230 | 31 | 233 | 7 |
| 16JN-58-5-17 | 411 | 417 | 0.98 | 0.261804 | 0.038928 | 0.036868 | 0.001092 | 236 | 31 | 233 | 7 |
| 16JN-58-5-18 | 619 | 458 | 1.35 | 0.263423 | 0.042136 | 0.036774 | 0.001089 | 237 | 34 | 233 | 7 |
| 16JN-58-5-19 | 208 | 285 | 0.73 | 0.385804 | 0.055960 | 0.036450 | 0.001152 | 331 | 41 | 231 | 7 |
| 16JN-58-5-20 | 164 | 209 | 0.78 | 0.253220 | 0.071910 | 0.036408 | 0.001530 | 229 | 58 | 231 | 10 |
| Sample 16JN-58-10, fine-grained granite at the chilled margin of the Dashuang complex | | | | | | | | | | | |
| 16JN-58-10-1 | 691 | 485 | 1.42 | 0.259384 | 0.011566 | 0.036336 | 0.000492 | 234 | 9 | 230 | 3 |
| 16JN-58-10-2 | 1245 | 907 | 1.37 | 0.262502 | 0.009705 | 0.036291 | 0.000370 | 237 | 8 | 230 | 2 |
| 16JN-58-10-3 | 628 | 564 | 1.11 | 0.255823 | 0.011944 | 0.036296 | 0.000522 | 231 | 10 | 230 | 3 |
| 16JN-58-10-4 | 856 | 1360 | 0.63 | 0.257519 | 0.007641 | 0.036353 | 0.000372 | 233 | 6 | 230 | 2 |
| 16JN-58-10-5 | 426 | 598 | 0.71 | 0.250560 | 0.013792 | 0.036422 | 0.000601 | 227 | 11 | 231 | 4 |
| 16JN-58-10-6 | 1712 | 1611 | 1.06 | 0.256674 | 0.007954 | 0.036366 | 0.000385 | 232 | 6 | 230 | 2 |
| 16JN-58-10-7 | 1198 | 1245 | 0.96 | 0.257354 | 0.014847 | 0.036231 | 0.000404 | 233 | 12 | 229 | 3 |
| 16JN-58-10-8 | 2891 | 1946 | 1.49 | 0.247468 | 0.009496 | 0.036522 | 0.000307 | 225 | 8 | 231 | 2 |
| 16JN-58-10-9 | 306 | 306 | 1.00 | 0.257974 | 0.019000 | 0.036618 | 0.000630 | 233 | 15 | 232 | 4 |
| 16JN-58-10-10 | 581 | 656 | 0.89 | 0.251136 | 0.013588 | 0.036299 | 0.000487 | 227 | 11 | 230 | 3 |
| 16JN-58-10-11 | 569 | 811 | 0.70 | 0.253133 | 0.050167 | 0.036178 | 0.000533 | 229 | 41 | 229 | 3 |
| 16JN-58-10-12 | 853 | 1767 | 0.48 | 1.978072 | 0.039639 | 0.190637 | 0.002026 | 1108 | 14 | 1125 | 11 |
| 16JN-58-10-13 | 2043 | 1619 | 1.26 | 0.256351 | 0.073174 | 0.036506 | 0.000606 | 232 | 59 | 231 | 4 |
| 16JN-58-10-14 | 218 | 169 | 1.28 | 0.263924 | 0.041994 | 0.038719 | 0.001023 | 238 | 34 | 245 | 6 |
| 16JN-58-10-15 | 1656 | 1709 | 0.97 | 0.259148 | 0.012705 | 0.036562 | 0.000502 | 234 | 10 | 231 | 3 |
| 16JN-58-10-16 | 454 | 582 | 0.78 | 0.266263 | 0.013806 | 0.037872 | 0.000503 | 240 | 11 | 240 | 3 |
| 16JN-58-10-17 | 3880 | 1922 | 2.02 | 0.254686 | 0.007376 | 0.036225 | 0.000387 | 230 | 6 | 229 | 2 |
| 16JN-58-10-18 | 1257 | 1310 | 0.96 | 0.255057 | 0.007639 | 0.036252 | 0.000376 | 231 | 6 | 230 | 2 |
| 16JN-58-10-19 | 697 | 744 | 0.94 | 0.256127 | 0.012661 | 0.036281 | 0.000568 | 232 | 10 | 230 | 4 |
| 16JN-58-10-20 | 1236 | 1278 | 0.97 | 0.276708 | 0.013335 | 0.038656 | 0.000629 | 248 | 11 | 244 | 4 |
| Sample 16JN-58-12, gneiss of the Chencai Group intruded by the Dashuang complex | | | | | | | | | | | |
| 16JN-58-12-1 | 92 | 282 | 0.33 | 9.169513 | 0.720132 | 0.436669 | 0.012235 | 2355 | 72 | 2336 | 55 |
| 16JN-58-12-2 | 105 | 395 | 0.27 | 1.009623 | 0.097886 | 0.119873 | 0.004673 | 709 | 49 | 730 | 27 |
| 16JN-58-12-3c | 158 | 223 | 0.71 | 1.889662 | 0.171162 | 0.180892 | 0.004138 | 1077 | 60 | 1072 | 23 |
| 16JN-58-12-3 | 24 | 487 | 0.05 | 0.617781 | 0.063644 | 0.077843 | 0.002384 | 488 | 40 | 483 | 14 |
| 16JN-58-12-4 | 52 | 1113 | 0.05 | 0.592237 | 0.049496 | 0.078186 | 0.002057 | 472 | 32 | 485 | 12 |
| 16JN-58-12-5c | 101 | 54 | 1.88 | 12.697354 | 1.058686 | 0.519506 | 0.015465 | 2657 | 79 | 2697 | 66 |
| 16JN-58-12-5 | 62 | 81 | 0.77 | 8.784665 | 0.728123 | 0.433628 | 0.017706 | 2316 | 76 | 2322 | 80 |
| 16JN-58-12-6 | 29 | 395 | 0.07 | 0.809654 | 0.070836 | 0.097079 | 0.003473 | 602 | 40 | 597 | 20 |
| 16JN-58-12-7 | 112 | 233 | 0.48 | 9.514760 | 0.979633 | 0.451180 | 0.013437 | 2389 | 95 | 2400 | 60 |
| 16JN-58-12-8c | 96 | 281 | 0.34 | 1.850464 | 0.252288 | 0.179497 | 0.004521 | 1064 | 90 | 1064 | 25 |
| 16JN-58-12-8 | 14 | 775 | 0.02 | 0.589569 | 0.043778 | 0.077750 | 0.002182 | 471 | 28 | 483 | 13 |
| 16JN-58-12-9 | 13 | 383 | 0.04 | 0.677409 | 0.064079 | 0.082855 | 0.002530 | 525 | 39 | 513 | 15 |
| 16JN-58-12-10 | 28 | 260 | 0.11 | 0.821768 | 0.085958 | 0.096794 | 0.003925 | 609 | 48 | 596 | 23 |
| 16JN-58-12-11 | 113 | 520 | 0.22 | 0.805816 | 0.073257 | 0.096905 | 0.003552 | 600 | 41 | 596 | 21 |
| 16JN-58-12-12 | 62 | 258 | 0.24 | 6.857734 | 1.959482 | 0.383247 | 0.054639 | 2093 | 253 | 2091 | 255 |
| 16JN-58-12-13 | 6 | 518 | 0.01 | 0.531347 | 0.052579 | 0.071042 | 0.002221 | 433 | 35 | 442 | 13 |
| 16JN-58-12-14 | 29 | 275 | 0.11 | 0.879868 | 0.106334 | 0.102902 | 0.005217 | 641 | 57 | 631 | 30 |
| 16JN-58-12-15c | 26 | 43 | 0.61 | 1.707594 | 0.250787 | 0.170233 | 0.007195 | 1011 | 94 | 1013 | 40 |
| 16JN-58-12-15 | 559 | 407 | 1.37 | 0.535440 | 0.048825 | 0.071206 | 0.001930 | 435 | 32 | 443 | 12 |
| 16JN-58-12-16 | 158 | 274 | 0.57 | 1.666420 | 0.123962 | 0.168872 | 0.004510 | 996 | 47 | 1006 | 25 |
| 16JN-58-12-17 | 34 | 289 | 0.12 | 0.864451 | 0.208390 | 0.105433 | 0.003392 | 633 | 113 | 646 | 20 |
| 16JN-58-12-18 | 1354 | 1031 | 1.31 | 2.224587 | 0.266188 | 0.200997 | 0.006131 | 1189 | 84 | 1181 | 33 |
| 16JN-58-12-19 | 60 | 540 | 0.11 | 0.836886 | 0.064623 | 0.102715 | 0.003465 | 617 | 36 | 630 | 20 |
| 16JN-58-12-20c | 25 | 29 | 0.86 | 1.035744 | 0.323521 | 0.119061 | 0.006004 | 722 | 161 | 725 | 35 |
| 16JN-58-12-20 | 9 | 836 | 0.01 | 0.550266 | 0.043582 | 0.071089 | 0.001890 | 445 | 29 | 443 | 11 |
| Standard | | | | | | | | | | | |
| SRM610 | 659 | 617 | 1.07 | 29.903700 | 1.568980 | 0.233667 | 0.004221 | 3484 | 52 | 1354 | 22 |
| 91500std | 35 | 102 | 0.35 | 1.835037 | 0.074138 | 0.179487 | 0.002653 | 1058 | 27 | 1064 | 15 |
| 91500std | 33 | 93 | 0.36 | 1.865363 | 0.075706 | 0.178853 | 0.002202 | 1069 | 27 | 1061 | 12 |
| GJ-1 | 13 | 447 | 0.03 | 0.836932 | 0.026186 | 0.098649 | 0.001090 | 617 | 14 | 606 | 6 |
| GJ-1 | 13 | 421 | 0.03 | 0.861529 | 0.026672 | 0.099343 | 0.001008 | 631 | 15 | 611 | 6 |
| GJ-1 | 12 | 397 | 0.03 | 0.828030 | 0.024773 | 0.100094 | 0.001156 | 613 | 14 | 615 | 7 |
| 91500std | 22 | 62 | 0.36 | 1.822622 | 0.118079 | 0.179548 | 0.003215 | 1054 | 42 | 1065 | 18 |
| 91500std | 24 | 68 | 0.35 | 1.877778 | 0.105622 | 0.178792 | 0.003538 | 1073 | 37 | 1060 | 19 |
| SRM610 | 467 | 429 | 1.09 | 23.667400 | 1.742502 | 0.229746 | 0.005018 | 3255 | 72 | 1333 | 26 |
| 91500std | 22 | 62 | 0.36 | 1.691167 | 0.232674 | 0.184567 | 0.006796 | 1005 | 88 | 1092 | 37 |
| 91500std | 21 | 60 | 0.35 | 1.850200 | 0.266873 | 0.179170 | 0.006573 | 1064 | 95 | 1062 | 36 |
| 91500std | 23 | 61 | 0.37 | 1.842720 | 0.219181 | 0.179228 | 0.005993 | 1061 | 78 | 1063 | 33 |
| 91500std | 22 | 62 | 0.36 | 1.857680 | 0.198154 | 0.179112 | 0.006069 | 1066 | 70 | 1062 | 33 |
| 91500std | 24 | 62 | 0.38 | 1.626615 | 0.416857 | 0.199340 | 0.007438 | 981 | 161 | 1172 | 40 |
| 91500std | 26 | 68 | 0.37 | 1.850200 | 0.689911 | 0.179170 | 0.007215 | 1064 | 246 | 1062 | 39 |
| 91500std | 24 | 65 | 0.37 | 2.122953 | 0.294564 | 0.179017 | 0.006325 | 1156 | 96 | 1062 | 35 |
| 91500std | 28 | 70 | 0.39 | 1.850200 | 0.307854 | 0.179170 | 0.006737 | 1064 | 110 | 1062 | 37 |
| GJ-1 | 9 | 291 | 0.03 | 0.707947 | 0.071240 | 0.099423 | 0.002232 | 544 | 42 | 611 | 13 |
| GJ-1 | 9 | 293 | 0.03 | 0.631979 | 0.065976 | 0.097715 | 0.002213 | 497 | 41 | 601 | 13 |
| GJ-1 | 9 | 296 | 0.03 | 0.595052 | 0.061625 | 0.094604 | 0.002279 | 474 | 39 | 583 | 13 |
| 91500std | 26 | 70 | 0.38 | 1.869038 | 0.254294 | 0.178283 | 0.007270 | 1070 | 90 | 1058 | 40 |
| 91500std | 28 | 72 | 0.38 | 1.831362 | 0.219886 | 0.180057 | 0.005515 | 1057 | 79 | 1067 | 30 |
| SRM610 | 493 | 457 | 1.08 | 22.733820 | 3.776266 | 0.232762 | 0.011017 | 3216 | 162 | 1349 | 58 |
| SRM610 | 761 | 712 | 1.07 | 29.547080 | 1.378523 | 0.234520 | 0.004107 | 3472 | 46 | 1358 | 21 |
| 91500std | 68 | 196 | 0.34 | 1.832694 | 0.072652 | 0.179549 | 0.002657 | 1057 | 26 | 1065 | 15 |
| 91500std | 74 | 217 | 0.34 | 1.867706 | 0.060078 | 0.178791 | 0.002028 | 1070 | 21 | 1060 | 11 |
| GJ-1 | 26 | 866 | 0.03 | 0.819503 | 0.025060 | 0.100215 | 0.001359 | 608 | 14 | 616 | 8 |
| GJ-1 | 29 | 1001 | 0.03 | 0.799725 | 0.020282 | 0.097955 | 0.000984 | 597 | 11 | 602 | 6 |
| GJ-1 | 26 | 845 | 0.03 | 0.817979 | 0.020787 | 0.099198 | 0.000916 | 607 | 12 | 610 | 5 |
| 91500std | 63 | 181 | 0.35 | 1.857597 | 0.056407 | 0.177983 | 0.002269 | 1066 | 20 | 1056 | 12 |
| 91500std | 66 | 184 | 0.36 | 1.842803 | 0.055711 | 0.180357 | 0.002312 | 1061 | 20 | 1069 | 13 |
| 91500std | 73 | 209 | 0.35 | 1.849797 | 0.066590 | 0.178181 | 0.002705 | 1063 | 24 | 1057 | 15 |
| 91500std | 73 | 215 | 0.34 | 1.850603 | 0.059136 | 0.180159 | 0.002399 | 1064 | 21 | 1068 | 13 |
| 91500std | 74 | 204 | 0.36 | 1.851178 | 0.073550 | 0.180256 | 0.001994 | 1064 | 26 | 1068 | 11 |
| 91500std | 79 | 218 | 0.36 | 1.849222 | 0.064134 | 0.178084 | 0.001884 | 1063 | 23 | 1056 | 10 |
| GJ-1 | 26 | 850 | 0.03 | 0.781143 | 0.018265 | 0.098471 | 0.001002 | 586 | 10 | 605 | 6 |
| GJ-1 | 27 | 886 | 0.03 | 0.796192 | 0.021703 | 0.098651 | 0.001073 | 595 | 12 | 606 | 6 |
| GJ-1 | 31 | 1028 | 0.03 | 0.799347 | 0.022618 | 0.096398 | 0.001124 | 596 | 13 | 593 | 7 |
| 91500std | 96 | 250 | 0.38 | 1.872596 | 0.063351 | 0.177845 | 0.002440 | 1071 | 22 | 1055 | 13 |
| 91500std | 89 | 236 | 0.38 | 1.827804 | 0.066064 | 0.180495 | 0.002413 | 1055 | 24 | 1070 | 13 |
| SRM610 | 742 | 694 | 1.07 | 28.168200 | 1.276059 | 0.230882 | 0.004117 | 3425 | 44 | 1339 | 22 |
| SRM610 | 431 | 421 | 1.02 | 24.330190 | 2.760191 | 0.231174 | 0.007021 | 3282 | 111 | 1341 | 37 |
| 91500std | 24 | 68 | 0.36 | 1.757495 | 0.258027 | 0.173298 | 0.006413 | 1030 | 95 | 1030 | 35 |
| 91500std | 24 | 67 | 0.35 | 1.850200 | 0.247028 | 0.179170 | 0.006330 | 1064 | 88 | 1062 | 35 |
| GJ-1 | 7 | 273 | 0.03 | 0.657115 | 0.075144 | 0.093695 | 0.002702 | 513 | 46 | 577 | 16 |
| GJ-1 | 8 | 279 | 0.03 | 0.805991 | 0.083130 | 0.096073 | 0.002430 | 600 | 47 | 591 | 14 |
| GJ-1 | 8 | 279 | 0.03 | 0.760575 | 0.075975 | 0.094367 | 0.002322 | 574 | 44 | 581 | 14 |
| 91500std | 24 | 68 | 0.35 | 1.841861 | 0.238230 | 0.180278 | 0.005835 | 1061 | 85 | 1068 | 32 |
| 91500std | 21 | 62 | 0.34 | 1.858539 | 0.248095 | 0.178062 | 0.005593 | 1066 | 88 | 1056 | 31 |
| 91500std | 27 | 79 | 0.35 | 1.700282 | 0.207873 | 0.194547 | 0.006534 | 1009 | 78 | 1146 | 35 |
| 91500std | 24 | 69 | 0.35 | 1.850200 | 0.223779 | 0.179170 | 0.006976 | 1064 | 80 | 1062 | 38 |
| 91500std | 29 | 86 | 0.34 | 1.793776 | 0.189137 | 0.193137 | 0.006515 | 1043 | 69 | 1138 | 35 |
| 91500std | 29 | 82 | 0.35 | 1.850200 | 0.202011 | 0.179170 | 0.007140 | 1064 | 72 | 1062 | 39 |
| GJ-1 | 11 | 379 | 0.03 | 0.737885 | 0.052212 | 0.095609 | 0.002000 | 561 | 31 | 589 | 12 |
| GJ-1 | 11 | 406 | 0.03 | 0.673756 | 0.054274 | 0.093165 | 0.001922 | 523 | 33 | 574 | 11 |
| GJ-1 | 10 | 322 | 0.03 | 0.737893 | 0.059086 | 0.094084 | 0.002060 | 561 | 35 | 580 | 12 |
| 91500std | 32 | 92 | 0.34 | 1.759306 | 0.176183 | 0.180095 | 0.004966 | 1031 | 65 | 1067 | 27 |
| 91500std | 28 | 81 | 0.34 | 1.941094 | 0.168711 | 0.178245 | 0.004996 | 1095 | 58 | 1057 | 27 |
| SRM610 | 622 | 621 | 1.00 | 24.902230 | 3.004790 | 0.227454 | 0.008440 | 3304 | 118 | 1321 | 44 |

Supplementary Table 3 In-situ zircon Hf isotopic composition analytical results of the Dashuang complex and Chencai Group

| Sample | 176Hf/177Hf | 1σ | 176Lu/177Hf | 1σ | 176Yb/177Hf | 1σ | fLu/Hf | εHf(t) | 1σ | TDM1 | TDM2 |
| --- | --- | --- | --- | --- | --- | --- | --- | --- | --- | --- | --- |
| Sample 16JN-58-5, quartz monzonite in the southeastern part of the Dashuang complex | | | | | | | | | | | |
| 16JN-58-5-1 | 0.282227 | 0.000014 | 0.000890 | 0.000023 | 0.043354 | 0.001082 | -0.973207 | -14.2 | 0.7 | 1441 | 1922 |
| 16JN-58-5-2 | 0.282267 | 0.000015 | 0.000670 | 0.000006 | 0.030017 | 0.000425 | -0.979812 | -12.8 | 0.8 | 1378 | 1844 |
| 16JN-58-5-4 | 0.282257 | 0.000015 | 0.000612 | 0.000006 | 0.028298 | 0.000415 | -0.981578 | -13.2 | 0.7 | 1389 | 1862 |
| 16JN-58-5-5 | 0.282239 | 0.000015 | 0.000573 | 0.000008 | 0.026572 | 0.000351 | -0.982733 | -13.8 | 0.8 | 1412 | 1897 |
| 16JN-58-5-6 | 0.282236 | 0.000016 | 0.000577 | 0.000024 | 0.024211 | 0.001296 | -0.982632 | -14.0 | 0.8 | 1417 | 1905 |
| 16JN-58-5-7 | 0.282245 | 0.000015 | 0.000754 | 0.000018 | 0.033954 | 0.000687 | -0.977288 | -13.6 | 0.7 | 1411 | 1887 |
| 16JN-58-5-8 | 0.282279 | 0.000014 | 0.000560 | 0.000013 | 0.025502 | 0.000551 | -0.983128 | -12.4 | 0.7 | 1357 | 1819 |
| 16JN-58-5-10 | 0.282295 | 0.000020 | 0.000536 | 0.000015 | 0.024932 | 0.001053 | -0.983868 | -11.9 | 0.9 | 1334 | 1788 |
| 16JN-58-5-12 | 0.282263 | 0.000017 | 0.000956 | 0.000021 | 0.047723 | 0.000920 | -0.971215 | -13.1 | 0.8 | 1394 | 1855 |
| 16JN-58-5-13 | 0.282271 | 0.000017 | 0.000775 | 0.000017 | 0.035077 | 0.000645 | -0.976657 | -12.7 | 0.8 | 1376 | 1837 |
| 16JN-58-5-14 | 0.282253 | 0.000016 | 0.000944 | 0.000043 | 0.046368 | 0.002442 | -0.971580 | -13.4 | 0.8 | 1406 | 1873 |
| 16JN-58-5-15 | 0.282271 | 0.000019 | 0.000326 | 0.000013 | 0.013290 | 0.000709 | -0.990174 | -12.6 | 0.9 | 1360 | 1833 |
| 16JN-58-5-16 | 0.282286 | 0.000020 | 0.000734 | 0.000008 | 0.032478 | 0.000463 | -0.977897 | -12.2 | 0.9 | 1354 | 1808 |
| 16JN-58-5-19 | 0.282285 | 0.000019 | 0.000676 | 0.000014 | 0.029484 | 0.000772 | -0.979640 | -12.3 | 0.9 | 1353 | 1809 |
| 16JN-58-5-20 | 0.282292 | 0.000019 | 0.001445 | 0.000102 | 0.075132 | 0.005143 | -0.956475 | -12.1 | 0.9 | 1371 | 1802 |
| Sample 16JN-58-10, fine-grained granite at the chilled margin of the Dashuang complex | | | | | | | | | | | |
| 16JN-58-10-1 | 0.282413 | 0.000022 | 0.001646 | 0.000025 | 0.068753 | 0.000567 | -0.950410 | -7.9 | 0.9 | 1206 | 1568 |
| 16JN-58-10-2 | 0.282388 | 0.000015 | 0.000791 | 0.000005 | 0.038303 | 0.000342 | -0.976185 | -8.6 | 0.8 | 1213 | 1609 |
| 16JN-58-10-3 | 0.282383 | 0.000018 | 0.000552 | 0.000014 | 0.023674 | 0.000590 | -0.983387 | -8.8 | 0.8 | 1214 | 1619 |
| 16JN-58-10-4 | 0.282393 | 0.000011 | 0.000953 | 0.000010 | 0.044950 | 0.000479 | -0.971292 | -8.5 | 0.7 | 1211 | 1601 |
| 16JN-58-10-5 | 0.282408 | 0.000013 | 0.000677 | 0.000015 | 0.030568 | 0.000760 | -0.979619 | -7.9 | 0.7 | 1183 | 1570 |
| 16JN-58-10-6 | 0.282281 | 0.000013 | 0.000882 | 0.000014 | 0.038929 | 0.001007 | -0.973426 | -12.4 | 0.7 | 1366 | 1819 |
| 16JN-58-10-7 | 0.282394 | 0.000012 | 0.000835 | 0.000007 | 0.037007 | 0.000296 | -0.974859 | -8.5 | 0.7 | 1207 | 1599 |
| 16JN-58-10-8 | 0.282264 | 0.000014 | 0.000950 | 0.000019 | 0.039556 | 0.001018 | -0.971382 | -13.1 | 0.7 | 1392 | 1854 |
| 16JN-58-10-9 | 0.282393 | 0.000017 | 0.000574 | 0.000004 | 0.026580 | 0.000198 | -0.982702 | -8.4 | 0.8 | 1200 | 1598 |
| 16JN-58-10-10 | 0.282391 | 0.000016 | 0.000736 | 0.000007 | 0.032410 | 0.000306 | -0.977823 | -8.5 | 0.8 | 1208 | 1603 |
| 16JN-58-10-11 | 0.282455 | 0.000014 | 0.001162 | 0.000029 | 0.050153 | 0.001298 | -0.965014 | -6.3 | 0.7 | 1132 | 1482 |
| 16JN-58-10-12 | 0.282121 | 0.000013 | 0.001204 | 0.000014 | 0.055246 | 0.000438 | -0.963735 | -18.2 | 0.7 | 1602 | 2133 |
| 16JN-58-10-13 | 0.282409 | 0.000015 | 0.000945 | 0.000013 | 0.043605 | 0.000515 | -0.971546 | 11.4 | 0.8 | 1189 | 1214 |
| 16JN-58-10-14 | 0.282422 | 0.000021 | 0.001387 | 0.000031 | 0.058118 | 0.000904 | -0.958222 | -7.5 | 0.9 | 1185 | 1547 |
| 16JN-58-10-15 | 0.282274 | 0.000012 | 0.001043 | 0.000044 | 0.045818 | 0.002244 | -0.968594 | -12.4 | 0.7 | 1381 | 1828 |
| 16JN-58-10-16 | 0.282408 | 0.000013 | 0.000933 | 0.000008 | 0.041994 | 0.000370 | -0.971904 | -7.9 | 0.7 | 1191 | 1572 |
| 16JN-58-10-17 | 0.282442 | 0.000015 | 0.001146 | 0.000022 | 0.055587 | 0.000867 | -0.965470 | -6.6 | 0.7 | 1150 | 1504 |
| 16JN-58-10-18 | 0.282278 | 0.000013 | 0.000620 | 0.000004 | 0.028551 | 0.000217 | -0.981315 | -12.5 | 0.7 | 1360 | 1823 |
| 16JN-58-10-19 | 0.282398 | 0.000014 | 0.000838 | 0.000009 | 0.039111 | 0.000434 | -0.974774 | -8.3 | 0.7 | 1202 | 1592 |
| 16JN-58-10-20 | 0.282259 | 0.000019 | 0.001111 | 0.000057 | 0.045996 | 0.001597 | -0.966543 | -13.3 | 0.9 | 1405 | 1865 |
| Sample 16JN-58-12, gneissof the Chencai Group intruded by the Dashuang complex | | | | | | | | | | | |
| 16JN-58-12-1 | 0.281499 | 0.000013 | 0.000702 | 0.000005 | 0.028889 | 0.000378 | -0.978847 | 6.2 | 0.8 | 2432 | 2471 |
| 16JN-58-12-2 | 0.282260 | 0.000012 | 0.000642 | 0.000004 | 0.026898 | 0.000340 | -0.980657 | -2.3 | 0.7 | 1386 | 1654 |
| 16JN-58-12-3c | 0.282409 | 0.000014 | 0.001042 | 0.000031 | 0.038247 | 0.001091 | -0.968601 | 10.2 | 0.8 | 1192 | 1240 |
| 16JN-58-12-4 | 0.282553 | 0.000012 | 0.000814 | 0.000016 | 0.033235 | 0.000697 | -0.975486 | 2.7 | 0.7 | 984 | 1184 |
| 16JN-58-12-5c | 0.280724 | 0.000012 | 0.000486 | 0.000015 | 0.021653 | 0.000730 | -0.985356 | -12.8 | 0.8 | 3455 | 3769 |
| 16JN-58-12-6 | 0.282475 | 0.000014 | 0.001422 | 0.000009 | 0.069445 | 0.000679 | -0.957175 | 2.1 | 0.7 | 1110 | 1305 |
| 16JN-58-12-8c | 0.282090 | 0.000013 | 0.000200 | 0.000017 | 0.010332 | 0.000710 | -0.993963 | -0.7 | 0.8 | 1603 | 1831 |
| 16JN-58-12-9 | 0.282202 | 0.000013 | 0.000787 | 0.000016 | 0.036204 | 0.000787 | -0.976282 | -9.1 | 0.7 | 1472 | 1859 |
| 16JN-58-12-13 | 0.281952 | 0.000013 | 0.000753 | 0.000050 | 0.033133 | 0.002118 | -0.977307 | -19.5 | 0.7 | 1816 | 2370 |
| 16JN-58-12-15c | 0.281971 | 0.000015 | 0.000854 | 0.000010 | 0.041705 | 0.000500 | -0.974266 | -6.5 | 0.8 | 1794 | 2107 |
| 16JN-58-12-16 | 0.281903 | 0.000017 | 0.000806 | 0.000005 | 0.040059 | 0.000230 | -0.975733 | -9.0 | 0.8 | 1886 | 2240 |
| 16JN-58-12-18 | 0.282048 | 0.000013 | 0.000914 | 0.000029 | 0.047785 | 0.001502 | -0.972473 | -0.2 | 0.8 | 1691 | 1894 |
| 16JN-58-12-20c | 0.282060 | 0.000015 | 0.000011 | 0.000002 | 0.000608 | 0.000068 | -0.999663 | -9.2 | 0.8 | 1636 | 2029 |
| Standard | | | | | | | | | | | |
| 91500 | 0.282318 | 0.000014 | 0.000268 | 0.000001 | 0.011907 | 0.000093 | -0.991941 | -16.1 | 0.7 | 1294 | 1840 |
| 91500 | 0.282298 | 0.000012 | 0.000278 | 0.000001 | 0.011900 | 0.000075 | -0.991642 | -16.7 | 0.7 | 1321 | 1878 |
| GJ-1 | 0.282035 | 0.000012 | 0.000245 | 0.000001 | 0.012358 | 0.000120 | -0.992628 | -26.1 | 0.7 | 1679 | 2389 |
| GJ-1 | 0.282031 | 0.000012 | 0.000245 | 0.000001 | 0.012412 | 0.000100 | -0.992618 | -26.2 | 0.7 | 1684 | 2397 |
| TEM | 0.282707 | 0.000017 | 0.001406 | 0.000019 | 0.060449 | 0.000472 | -0.957660 | -2.3 | 0.8 | 781 | 1077 |
| TEM | 0.282649 | 0.000016 | 0.000674 | 0.000008 | 0.029036 | 0.000453 | -0.979692 | -4.4 | 0.8 | 847 | 1191 |
| 91500 | 0.282297 | 0.000012 | 0.000272 | 0.000001 | 0.011956 | 0.000203 | -0.991797 | -16.8 | 0.7 | 1323 | 1881 |
| 91500 | 0.282319 | 0.000013 | 0.000273 | 0.000001 | 0.011851 | 0.000184 | -0.991785 | -16.0 | 0.7 | 1292 | 1837 |
| 91500 | 0.282302 | 0.000020 | 0.000270 | 0.000001 | 0.011928 | 0.000064 | -0.991859 | -16.6 | 0.9 | 1315 | 1870 |
| 91500 | 0.282314 | 0.000015 | 0.000275 | 0.000001 | 0.011878 | 0.000055 | -0.991723 | -16.2 | 0.7 | 1299 | 1847 |
| 91500 | 0.282282 | 0.000017 | 0.000261 | 0.000002 | 0.011882 | 0.000136 | -0.992151 | -17.3 | 0.8 | 1342 | 1909 |
| 91500 | 0.282334 | 0.000024 | 0.000284 | 0.000004 | 0.011925 | 0.000140 | -0.991431 | -15.5 | 1.0 | 1272 | 1808 |
| 91500 | 0.282300 | 0.000027 | 0.000291 | 0.000003 | 0.012992 | 0.000165 | -0.991233 | -16.7 | 1.1 | 1319 | 1875 |
| 91500 | 0.282316 | 0.000030 | 0.000254 | 0.000003 | 0.010815 | 0.000138 | -0.992349 | -16.1 | 1.2 | 1295 | 1843 |
| 91500 | 0.282310 | 0.000015 | 0.000275 | 0.000001 | 0.012155 | 0.000110 | -0.991729 | -16.3 | 0.7 | 1304 | 1855 |
| 91500 | 0.282303 | 0.000016 | 0.000271 | 0.000002 | 0.012148 | 0.000086 | -0.991850 | -16.6 | 0.8 | 1313 | 1868 |
| 91500 | 0.282316 | 0.000014 | 0.000265 | 0.000003 | 0.011299 | 0.000099 | -0.992021 | -16.1 | 0.7 | 1296 | 1844 |
| 91500 | 0.282300 | 0.000016 | 0.000280 | 0.000003 | 0.012507 | 0.000104 | -0.991561 | -16.7 | 0.8 | 1318 | 1874 |
| TEM | 0.282710 | 0.000028 | 0.001266 | 0.000013 | 0.064223 | 0.001283 | -0.961880 | -2.2 | 1.1 | 773 | 1071 |
| TEM | 0.282675 | 0.000023 | 0.001239 | 0.000003 | 0.079556 | 0.000907 | -0.962672 | -3.4 | 1.0 | 822 | 1140 |
| GJ-1 | 0.282043 | 0.000014 | 0.000225 | 0.000001 | 0.011756 | 0.000114 | -0.993224 | -25.8 | 0.7 | 1667 | 2373 |
| GJ-1 | 0.282030 | 0.000014 | 0.000223 | 0.000001 | 0.011771 | 0.000134 | -0.993286 | -26.3 | 0.7 | 1685 | 2400 |
| 91500 | 0.282310 | 0.000013 | 0.000271 | 0.000000 | 0.011474 | 0.000069 | -0.991835 | -16.3 | 0.7 | 1304 | 1855 |
| 91500 | 0.282306 | 0.000016 | 0.000274 | 0.000000 | 0.012333 | 0.000094 | -0.991747 | -16.5 | 0.8 | 1310 | 1863 |

Supplementary Table 4 Whole-rock Major and trace elements analytical results of the Dashuang complex

| Sample | GSR-1 | GSR-2 | Limits | 16JN-57-2 | 16JN-57-3 | 16JN-57-4 | 16JN-58-2 | 16JN-58-3 | 16JN-58-4 | 16JN-58-7 | 16JN-58-8 | 16JN-58-9 |
| --- | --- | --- | --- | --- | --- | --- | --- | --- | --- | --- | --- | --- |
| SiO2 | 73.03 | 60.86 | 0.05 | 65.64 | 65.95 | 65.75 | 63.74 | 64.14 | 64.77 | 77.96 | 77.74 | 75.68 |
| TiO2 | 0.28 | 0.53 | 0.02 | 0.42 | 0.39 | 0.41 | 0.83 | 0.80 | 0.77 | 0.08 | 0.08 | 0.07 |
| Al2O3 | 13.39 | 16.02 | 0.02 | 17.72 | 17.62 | 17.74 | 16.70 | 14.98 | 15.97 | 12.29 | 12.11 | 14.22 |
| Fe2O3 | 0.96 | 2.24 | 0.02 | 1.16 | 1.23 | 1.32 | 1.80 | 2.03 | 1.76 | 0.16 | 0.08 | 0.28 |
| FeO | 1.05 | 1.50 | 0.02 | 1.45 | 1.05 | 1.20 | 2.37 | 2.49 | 2.41 | 0.27 | 0.27 | 0.20 |
| MnO | 0.06 | 0.08 | 0.02 | 0.11 | 0.11 | 0.11 | 0.08 | 0.10 | 0.10 | 0.01 | 0.01 | 0.01 |
| MgO | 0.45 | 1.65 | 0.02 | 0.29 | 0.23 | 0.26 | 1.91 | 1.94 | 1.92 | 0.17 | 0.17 | 0.24 |
| CaO | 1.56 | 5.14 | 0.02 | 1.02 | 1.23 | 1.03 | 3.11 | 5.24 | 4.21 | 0.57 | 0.81 | 0.35 |
| Na2O | 3.11 | 3.89 | 0.02 | 4.77 | 4.82 | 4.93 | 3.24 | 2.67 | 3.14 | 2.64 | 2.62 | 2.31 |
| K2O | 5.05 | 1.86 | 0.03 | 7.33 | 7.31 | 7.17 | 5.81 | 5.22 | 4.93 | 5.83 | 6.09 | 6.62 |
| P2O5 | 0.10 | 0.23 | 0.02 | 0.07 | 0.06 | 0.07 | 0.42 | 0.39 | 0.41 | 0.00 | 0.01 | 0.01 |
| LOI | 0.72 | 4.45 | 0.02 | 1.42 | 1.48 | 1.39 | 3.83 | 5.53 | 4.70 | 0.98 | 1.03 | 0.75 |
| Na2O+K2O |  |  |  | 12.10 | 12.13 | 12.10 | 9.05 | 7.90 | 8.07 | 8.47 | 8.71 | 8.93 |
| FeOT |  |  |  | 2.49 | 2.15 | 2.39 | 3.99 | 4.31 | 3.99 | 0.42 | 0.35 | 0.45 |
| FeOT/MgO |  |  |  | 8.48 | 9.33 | 9.15 | 2.09 | 2.22 | 2.08 | 2.41 | 2.02 | 1.86 |
| FeOT/(FeOT+MgO) |  |  |  | 0.89 | 0.90 | 0.90 | 0.68 | 0.69 | 0.68 | 0.71 | 0.67 | 0.65 |
| (Na2O+K2O)2/(SiO2-43) |  |  |  | 6.5 | 6.4 | 6.4 | 3.9 | 2.9 | 3.0 | 2.1 | 2.2 | 2.4 |
| Na2O+K2O+CaO |  |  |  | 13.13 | 13.36 | 13.13 | 12.16 | 13.13 | 12.27 | 9.04 | 9.53 | 9.28 |
| ACNK |  |  |  | 1.00 | 0.97 | 1.00 | 0.97 | 0.77 | 0.88 | 1.05 | 0.98 | 1.23 |
| Ga | 21.10 | 20.26 | 0.10 | 20.45 | 20.71 | 21.53 | 22.86 | 22.25 | 22.34 | 13.22 | 14.62 | 15.04 |
| Rb | 486.60 | 41.25 | 3.00 | 110.50 | 84.92 | 104.30 | 180.20 | 191.00 | 190.70 | 131.30 | 151.70 | 174.60 |
| Ba | 350.00 | 995.00 | 5.00 | 62.16 | 52.71 | 56.94 | 1618.72 | 1530.80 | 1265.04 | 408.75 | 463.16 | 421.99 |
| Th | 56.57 | 2.44 | 0.20 | 32.43 | 21.69 | 32.38 | 17.73 | 18.29 | 16.66 | 36.91 | 42.59 | 46.51 |
| U | 20.90 | 1.02 | 0.05 | 1.70 | 0.62 | 1.76 | 1.54 | 1.99 | 1.92 | 2.04 | 2.11 | 3.23 |
| K |  |  |  | 243.54 | 242.76 | 238.18 | 192.78 | 173.46 | 163.58 | 193.65 | 202.22 | 219.79 |
| Nb | 40.90 | 7.24 | 1.40 | 14.03 | 13.71 | 14.14 | 24.77 | 22.12 | 20.69 | 2.23 | 1.42 | 2.19 |
| Ta | 7.17 | 0.44 | 0.10 | 0.96 | 0.77 | 0.89 | 2.33 | 1.93 | 1.73 | 0.31 | 0.21 | 0.34 |
| Pb | 33.37 | 10.72 | 0.20 | 35.44 | 20.86 | 36.39 | 26.30 | 32.71 | 22.86 | 28.83 | 32.79 | 40.75 |
| Sr | 112.92 | 795.16 | 2.00 | 53.92 | 50.28 | 57.51 | 622.78 | 640.52 | 617.30 | 359.25 | 302.46 | 290.67 |
| P |  |  |  | 3.04 | 2.53 | 3.02 | 19.37 | 17.96 | 18.82 | 0.13 | 0.52 | 0.49 |
| Zr | 176.43 | 94.59 | 1.50 | 583.90 | 568.30 | 573.10 | 276.60 | 276.00 | 268.40 | 89.40 | 63.70 | 106.20 |
| Hf | 6.22 | 2.75 | 0.10 | 12.96 | 12.53 | 12.79 | 6.44 | 6.53 | 6.53 | 2.18 | 1.74 | 2.61 |
| Ti |  |  |  | 1.95 | 1.79 | 1.88 | 3.82 | 3.69 | 3.55 | 0.39 | 0.36 | 0.34 |
| Y | 68.34 | 10.20 | 0.12 | 14.34 | 17.06 | 16.09 | 24.64 | 30.01 | 28.60 | 1.66 | 1.42 | 2.40 |
| La | 55.79 | 20.45 | 0.10 | 265.8 | 285.6 | 289.9 | 94.04 | 103.8 | 100.7 | 12.66 | 19.67 | 12.26 |
| Ce | 108.50 | 38.99 | 0.20 | 478.4 | 484.2 | 484.8 | 185.8 | 199.8 | 195.9 | 16.92 | 24.86 | 16.43 |
| Pr | 13.02 | 4.92 | 0.02 | 47.81 | 52.91 | 52.88 | 22.38 | 23.79 | 23.26 | 1.38 | 1.91 | 1.42 |
| Nd | 47.11 | 19.07 | 0.08 | 153.1 | 171.1 | 166.7 | 81.29 | 85.46 | 84.37 | 3.69 | 4.78 | 4.09 |
| Sm | 9.59 | 3.31 | 0.03 | 16.58 | 19.07 | 17.86 | 11.69 | 12.37 | 12.28 | 0.38 | 0.42 | 0.51 |
| Eu | 0.89 | 1.00 | 0.01 | 1.42 | 1.64 | 1.53 | 2.27 | 2.81 | 2.40 | 0.42 | 0.44 | 0.45 |
| Gd | 8.92 | 2.71 | 0.03 | 9.66 | 10.85 | 9.92 | 7.86 | 8.82 | 8.50 | 0.39 | 0.42 | 0.49 |
| Tb | 1.71 | 0.39 | 0.02 | 1.01 | 1.13 | 1.02 | 1.06 | 1.21 | 1.14 | 0.04 | 0.04 | 0.06 |
| Dy | 10.49 | 1.96 | 0.03 | 3.81 | 4.37 | 4.06 | 5.12 | 5.93 | 5.56 | 0.21 | 0.18 | 0.33 |
| Ho | 2.23 | 0.37 | 0.01 | 0.63 | 0.73 | 0.68 | 0.94 | 1.11 | 1.02 | 0.05 | 0.04 | 0.07 |
| Er | 6.72 | 0.94 | 0.03 | 1.38 | 1.63 | 1.50 | 2.32 | 2.81 | 2.62 | 0.15 | 0.13 | 0.22 |
| Tm | 1.09 | 0.14 | 0.01 | 0.19 | 0.22 | 0.20 | 0.33 | 0.39 | 0.37 | 0.03 | 0.03 | 0.04 |
| Yb | 7.29 | 0.81 | 0.03 | 1.16 | 1.35 | 1.25 | 1.96 | 2.29 | 2.12 | 0.23 | 0.21 | 0.34 |
| Lu | 1.16 | 0.13 | 0.01 | 0.20 | 0.22 | 0.21 | 0.30 | 0.34 | 0.32 | 0.05 | 0.05 | 0.09 |
| REE |  |  |  | 981.15 | 1035.00 | 1032.50 | 417.36 | 450.92 | 440.55 | 36.59 | 53.16 | 36.79 |
| δEu |  |  |  | 0.31 | 0.32 | 0.32 | 0.68 | 0.78 | 0.68 | 3.30 | 3.16 | 2.73 |
| Y+Nb |  |  |  | 28.37 | 30.77 | 30.23 | 49.41 | 52.13 | 49.29 | 3.89 | 2.83 | 4.59 |
| (La/Yb)N |  |  |  | 164 | 152 | 166 | 34 | 33 | 34 | 40 | 68 | 26 |
| 10000Ga/Al |  |  |  | 2.2 | 2.2 | 2.3 | 2.6 | 2.8 | 2.6 | 2.0 | 2.3 | 2.0 |
| Zr+Nb+Ce+Y |  |  |  | 1091 | 1083 | 1088 | 511 | 528 | 514 | 110 | 91 | 127 |
| Y/Nb |  |  |  | 1.02 | 1.24 | 1.14 | 0.99 | 1.36 | 1.38 | 0.75 | 1.00 | 1.10 |
| Rb/Nb |  |  |  | 7.87 | 6.19 | 7.38 | 7.28 | 8.64 | 9.22 | 58.88 | 107.03 | 79.75 |
| Tzr |  |  |  | 857 | 850 | 856 | 766 | 717 | 748 | 723 | 688 | 747 |
